# Supplementary material for: Engineering additional edge sites on molybdenum dichalcogenides toward accelerated alkaline hydrogen evolution kinetics
Source: Royal Society of Chemistry journal article supplement (doi:10.1039/c8nr08028c), 2018-11-26
Supplement: c8nr08028c1.pdf [file c8nr08028c1.pdf]

## Supporting information

### **Engineering Additional Edge Sites on Molybdenum Dichalcogenides toward Accelerated Alkaline Hydrogen Evolution Kinetics**

*Qian Zhou<sup>+</sup>, Guoqiang Zhao<sup>+</sup>, Kun Rui, Yaping Chen, Xun Xu<sup>\*</sup>, Shi Xue Dou, Wenping Sun<sup>\*</sup>*

Institute for Superconducting and Electronic Materials, Australian Institute of Innovative Materials, University of Wollongong, Wollongong, NSW 2522, Australia

Email: xun@uow.edu.au; wenping@uow.edu.au

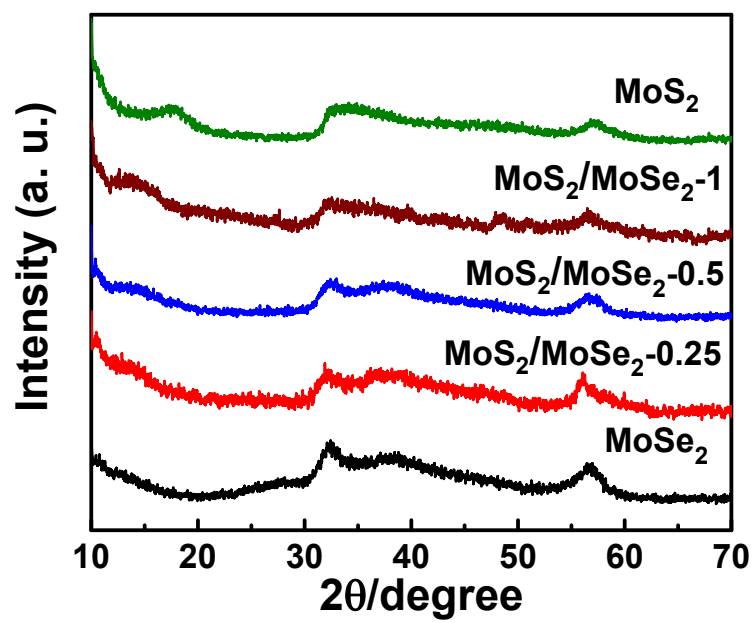

**Fig. S1.** XRD patterns of MoS<sub>2</sub>, MoSe<sub>2</sub>, and MoS<sub>2</sub>/MoSe<sub>2</sub>-x.

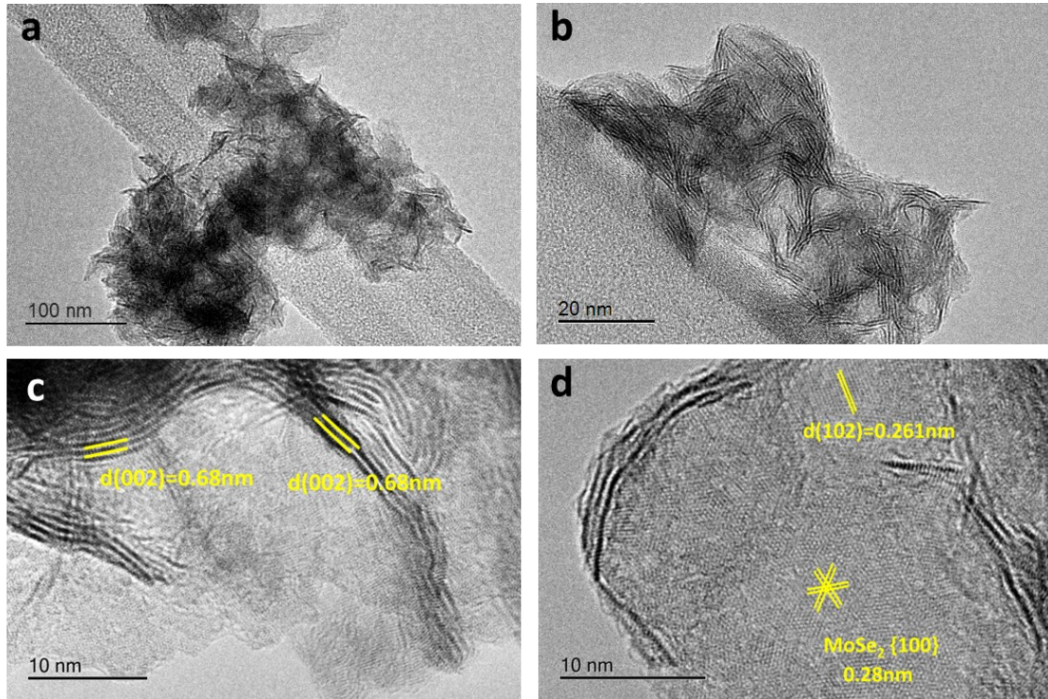

**Fig. S2.** (a), (b) TEM images and (c), (d) HRTEM images of pristine MoSe<sub>2</sub>.

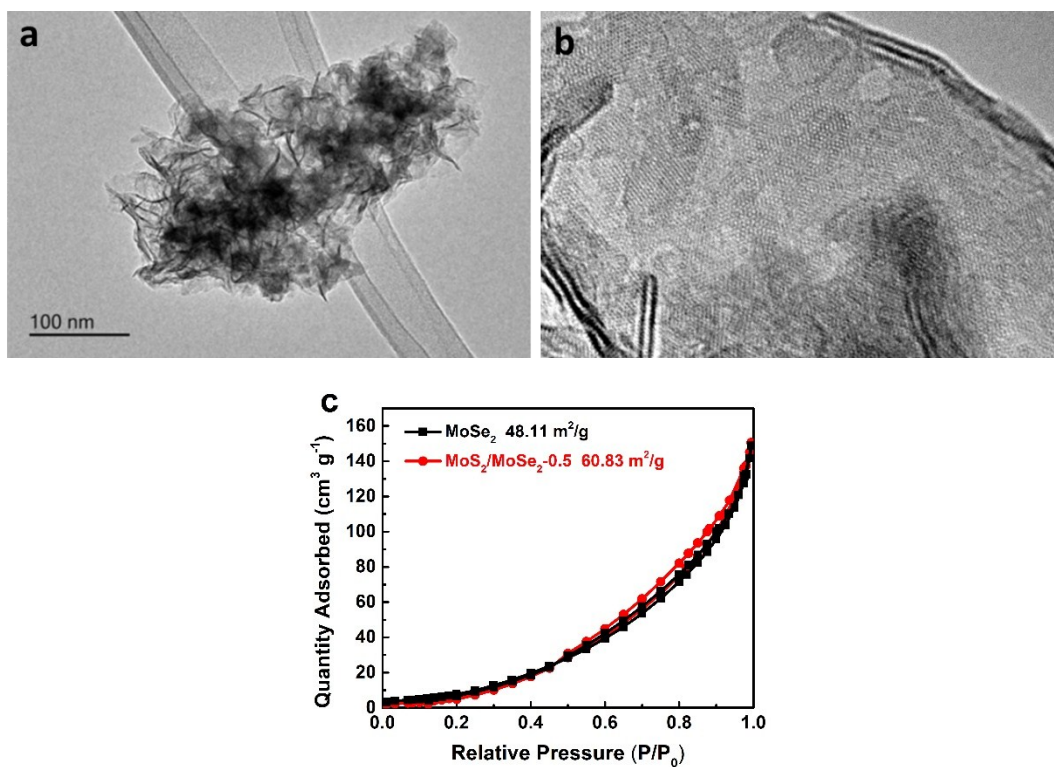

**Fig. S3.** (a) TEM, (b) HRTEM image of MoS<sub>2</sub>/MoSe<sub>2</sub>-0.5. (c) Nitrogen gas adsorption-desorption isotherms (BET curve) of MoSe<sub>2</sub> and MoS<sub>2</sub>-MoSe<sub>2</sub>-0.5, the specific surface areas of MoSe<sub>2</sub> and MoS<sub>2</sub>-MoSe<sub>2</sub>-0.5 are determined to be 48 and 61 m<sup>2</sup>/g, respectively

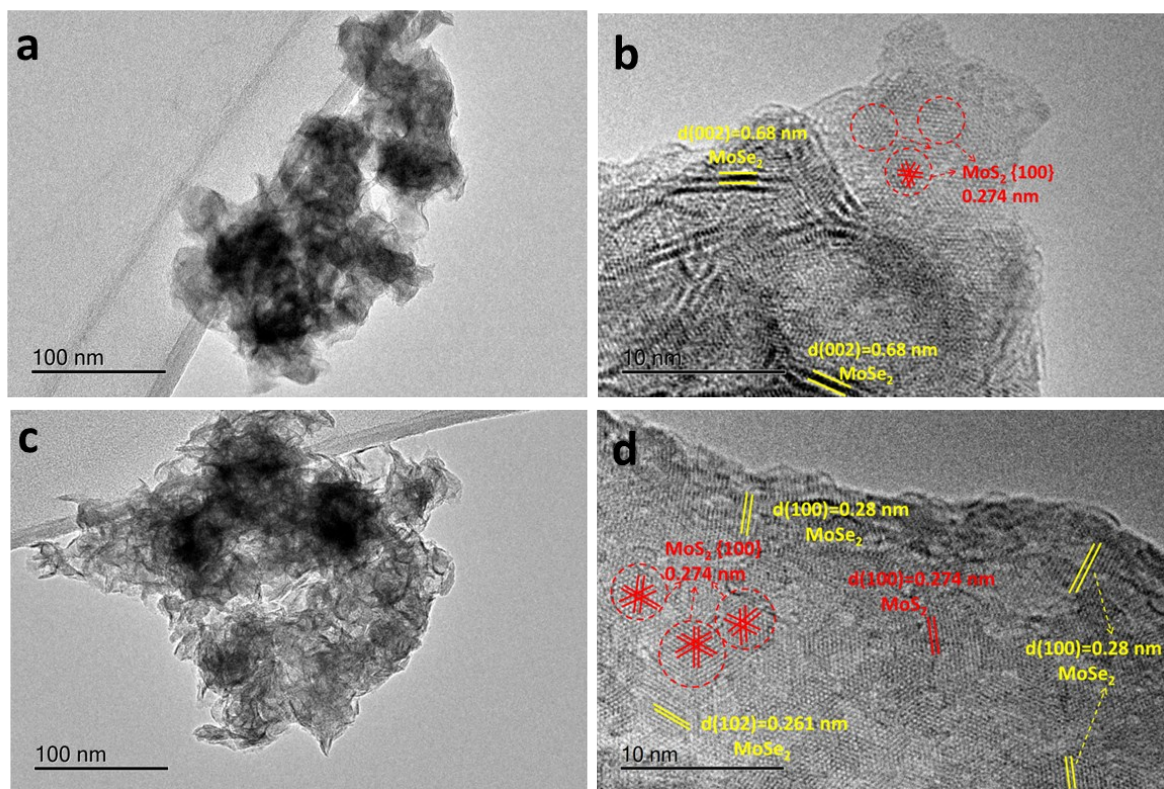

**Fig. S4.** (a) TEM, (b) HRTEM images of MoS<sub>2</sub>/MoSe<sub>2</sub>-0.25; (c) TEM, (d) HRTEM images of MoS<sub>2</sub>/MoSe<sub>2</sub>-1.

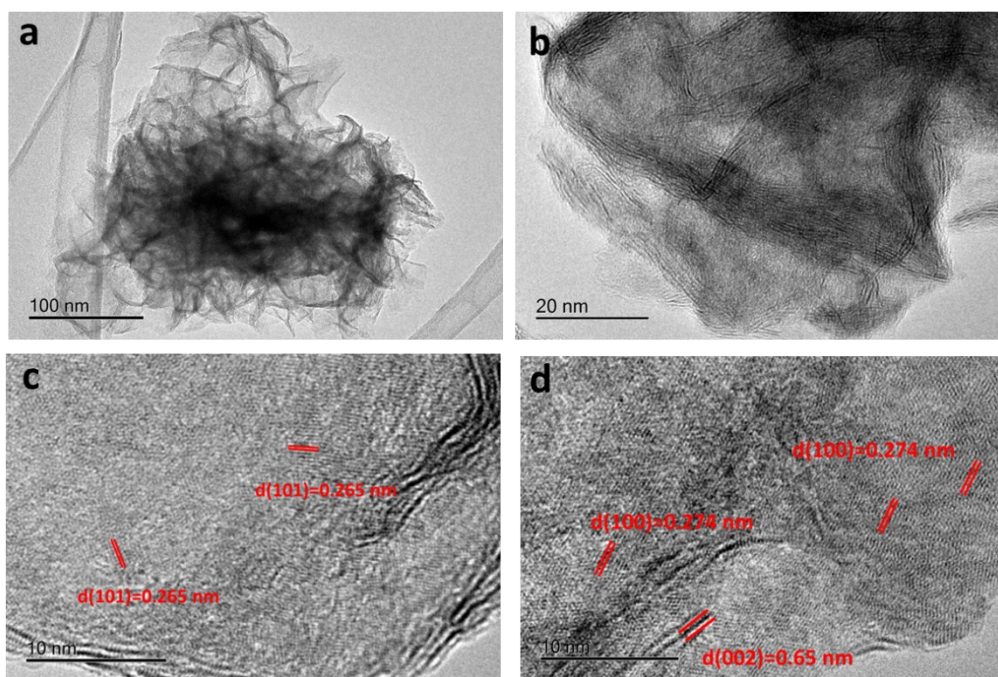

**Fig. S5.** (a), (b) TEM images and (c), (d) HRTEM images of pure MoS<sub>2</sub>.

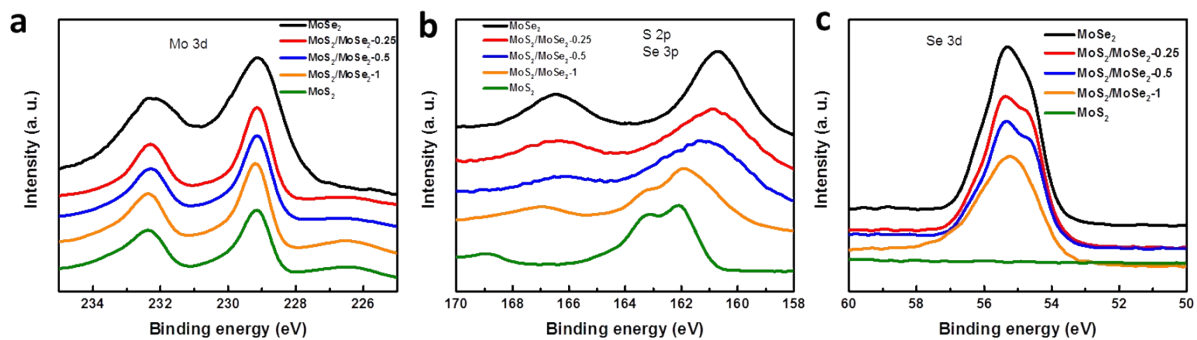

**Fig. S6.** (a) Mo 3d, (b) S 2p & Se 3p, (c) Se 3d XPS spectra of MoSe<sub>2</sub>, MoS<sub>2</sub>, and MoS<sub>2</sub>/MoSe<sub>2-x</sub> heterostructures.

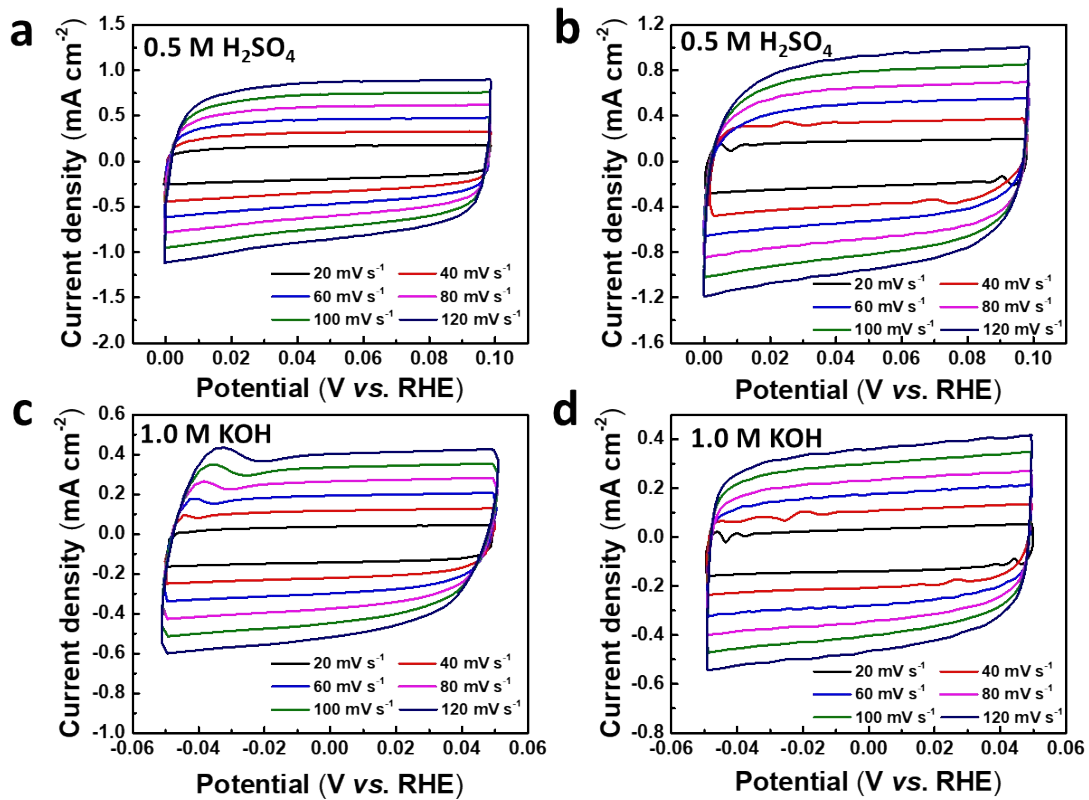

**Fig. S7.** CV curves of (a) (c) MoS<sub>2</sub>/MoSe<sub>2</sub>-0.5 and (b) (d) MoSe<sub>2</sub> electrode in 0.5 M H<sub>2</sub>SO<sub>4</sub> and 1M KOH and with different scan rates.



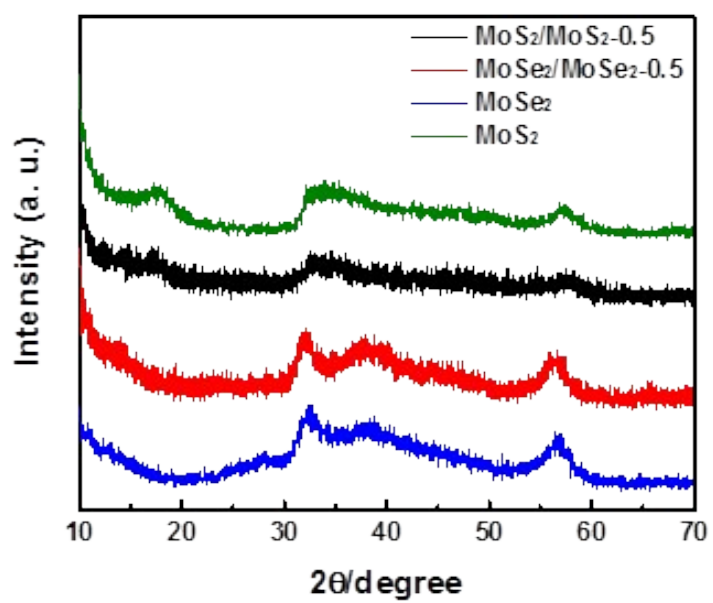

**Fig. S8.** XRD pattern of MoSe<sub>2</sub>, MoS<sub>2</sub>, MoSe<sub>2</sub>/MoSe<sub>2</sub>-0.5, and MoS<sub>2</sub>/MoS<sub>2</sub>-0.5.

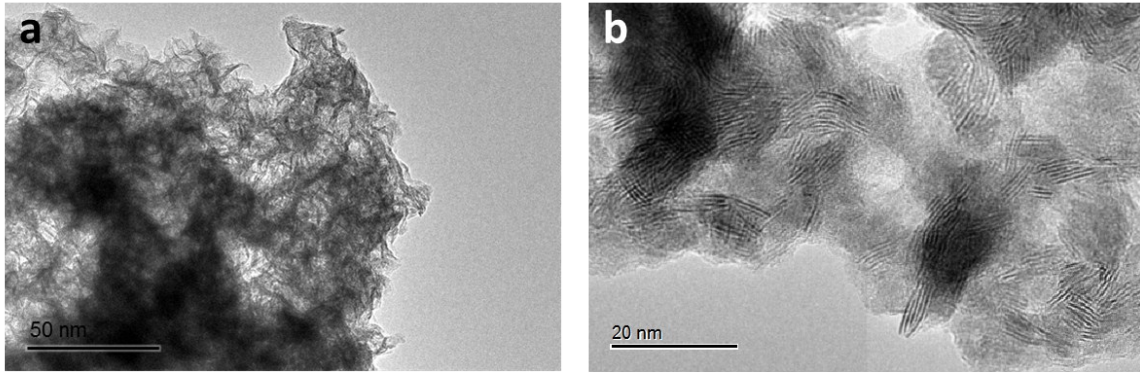

**Fig. S9.** (a), (b) TEM images of MoSe<sub>2</sub>/MoSe<sub>2</sub>-0.5.

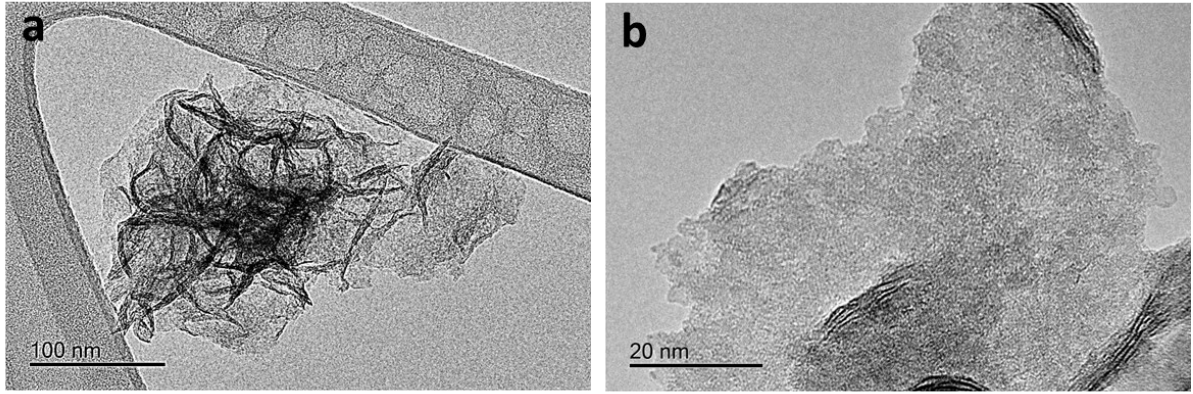

**Fig. S10.** (a), (b) TEM images of  $\text{MoS}_2/\text{MoS}_2\text{-}0.5$ .

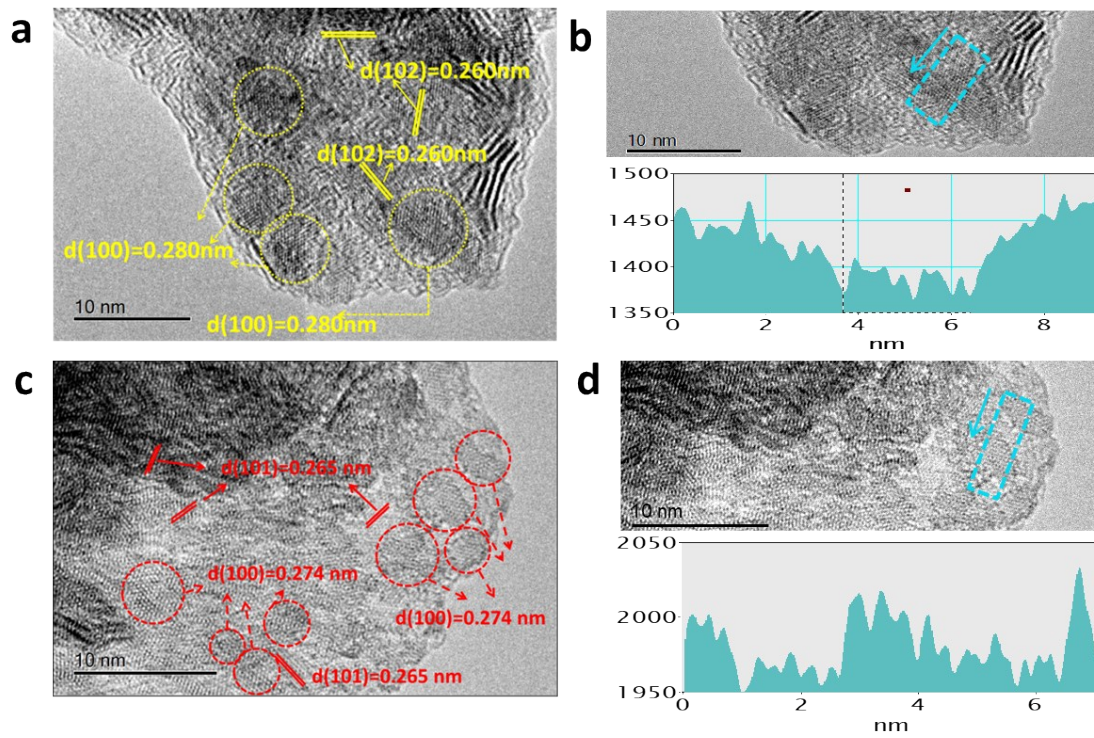

**Fig. S11.** TEM images of (a) MoSe<sub>2</sub>/MoSe<sub>2</sub>-0.5 and (c) MoS<sub>2</sub>/MoS<sub>2</sub>-0.5; Intensity profile of (b) MoSe<sub>2</sub>/MoSe<sub>2</sub>-0.5 and (d) MoS<sub>2</sub>/MoS<sub>2</sub>-0.5.

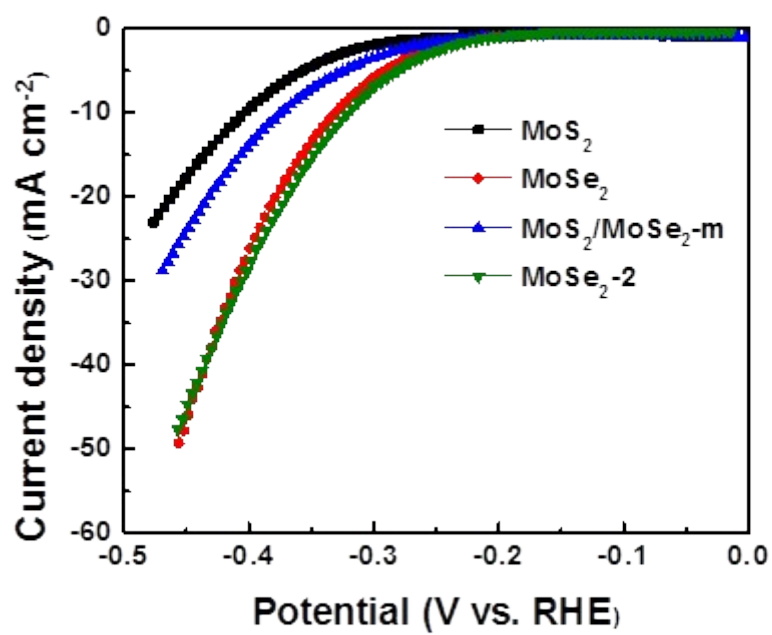

**Fig. S12.** (a) iR-corrected LSV curves measured at a scan rate of 5 mV s<sup>-1</sup> in 1M KOH solution.

**Table S1 HER performance comparison of MoS<sub>2</sub>-based and MoSe<sub>2</sub>-based materials in alkaline solution.**

| Catalyst                                 | Substrate | Electrolyte | Overpotential (mV<br>@ 10 mA cm <sup>-2</sup> ) | Reference |
|------------------------------------------|-----------|-------------|-------------------------------------------------|-----------|
| MoS <sub>2</sub> /MoSe <sub>2</sub>      | GC        | 1.0 M KOH   | 235                                             | This work |
| Ni(OH) <sub>2</sub> /MoS <sub>2</sub>    | GC        | 1.0 M KOH   | 227                                             | 1         |
| CoSe <sub>2</sub> /MoSe <sub>2</sub>     | GC        | 1.0 M KOH   | 218                                             | 2         |
| MoSe <sub>2</sub> -CoSe <sub>2</sub> NTs | GC        | 1.0 M KOH   | 237                                             | 3         |
| GwC-MoSe <sub>2</sub>                    | GC        | 1.0 M KOH   | ~350                                            | 4         |
| Ni(OH) <sub>2</sub> /MoS <sub>2</sub>    | CC        | 1.0 M KOH   | 80                                              | 5         |
| MoS <sub>2</sub> /NiCo-LDH               | CFP       | 1.0 M KOH   | 78                                              | 6         |
| MoS <sub>2</sub> /G                      | NF        | 0.1 M KOH   | >600                                            | 7         |
| MoS <sub>2+x</sub> nanoparticles         | FTO       | 1.0 M KOH   | 310                                             | 8         |
| ex-MoSe <sub>2</sub> :NiCl <sub>2</sub>  | NM        | 1.0 M KOH   | 273                                             | 9         |
| MoSe <sub>2</sub> /GCA                   | NF        | 1.0 M KOH   | ~300                                            | 10        |
| MoSe <sub>2</sub> :CdS NHDs              | PG        | 0.1 M KOH   | ~500                                            | 11        |
| MoSe <sub>2</sub> /MoO <sub>3</sub>      | PG        | 0.1 M KOH   | 270                                             | 12        |
| MoSe <sub>2</sub> @Ni <sub>0.85</sub> Se | NF        | 1.0 M KOH   | 117                                             | 13        |

Note: GC = Glassy Carbon CC = Carbon Cloth CFP = Carbon Fiber Paper FTO = Fluorine-doped Tin Oxide NM = Nylon Membranes NF = Nickel Foam PGE = Pencil Graphite

## Reference

- G. Zhao, Y. Lin, K. Rui, Q. Zhou, Y. Chen, S. X. Dou and W. Sun, *Nanoscale*, 2018, **10**, 19074-19081.
- G. Zhao, P. Li, K. Rui, Y. Chen, S. X. Dou and W. Sun, *Chemistry—A European Journal*, 2018, DOI: 10.1002/chem.201801693.
- X. Wang, B. Zheng, B. Yu, B. Wang, W. Hou, W. Zhang and Y. Chen, *Journal of Materials Chemistry A*, 2018, **6**, 7842-7850.
- Y. Huang, L. Zhang, H. Lu, F. Lai, Y.-E. Miao and T. Liu, *Inorganic Chemistry Frontiers*, 2016, **3**, 969-976.
- B. Zhang, J. Liu, J. Wang, Y. Ruan, X. Ji, K. Xu, C. Chen, H. Wan, L. Miao and J. Jiang, *Nano Energy*, 2017, **37**, 74-80.
- J. Hu, C. Zhang, L. Jiang, H. Lin, Y. An, D. Zhou, M. K. Leung and S. Yang, *Joule*, 2017, **1**, 383-393.
- X. Geng, W. Wu, N. Li, W. Sun, J. Armstrong, A. Al-hilo, M. Brozak, J. Cui and T. p. Chen, *Advanced Functional Materials*, 2014, **24**, 6123-6129.
- C. G. Morales-Guio, L. Liardet, M. T. Mayer, S. D. Tilley, M. Grätzel and X. Hu, *Angewandte Chemie*, 2015, **127**, 674-677.
- L. Najafi, S. Bellani, R. Oropesa-Nuñez, A. Ansaldo, M. Prato, A. E. Del Rio Castillo and F. Bonaccorso, *Advanced Energy Materials*, 2018, 1801764.
- Y. Huang, F. Lai, L. Zhang, H. Lu, Y.-E. Miao and T. Liu, *Scientific reports*, 2016, **6**, 31541.
- P. Karfa, R. Madhuri and P. K. Sharma, *Journal of Materials Chemistry A*, 2017, **5**, 1495-1508.

12. P. Karfa, R. Madhuri, P. K. Sharma and A. Tiwari, *Nano Energy*, 2017, **33**, 98-109.
13. C. Wang, P. Zhang, J. Lei, W. Dong and J. Wang, *Electrochim. Acta*, 2017, **246**, 712-719.
